# Supplementary material
Source: publisher figshare collection journal article supplement (https://acs.figshare.com/ndownloader/files/4077061)
Supplement: Supplementary file 1 [file 4077061]

Interactions of Binuclear Ruthenium (II) Complexes with  
Oligonucleotides in Hydrogel Matrix: Enantioselective  
Threading Intercalation into GC Context

Piotr Hanczyc<sup>1,2</sup>, Per Lincoln<sup>1</sup>, Bengt Norden<sup>1\*</sup>

## Supporting information

### 1. LD spectra and calculated $LD^f$ values of free short oligonucleotides in PVA

A

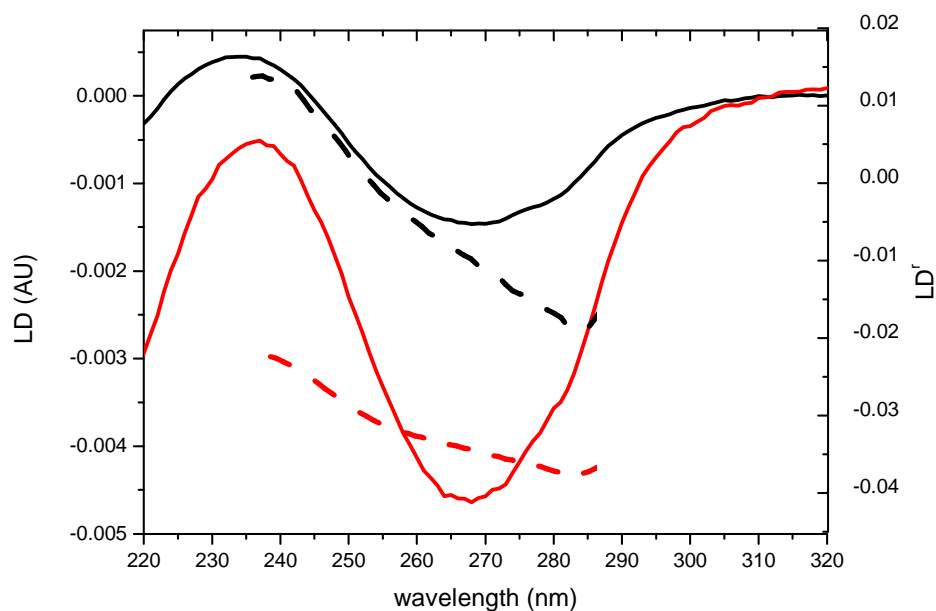

B

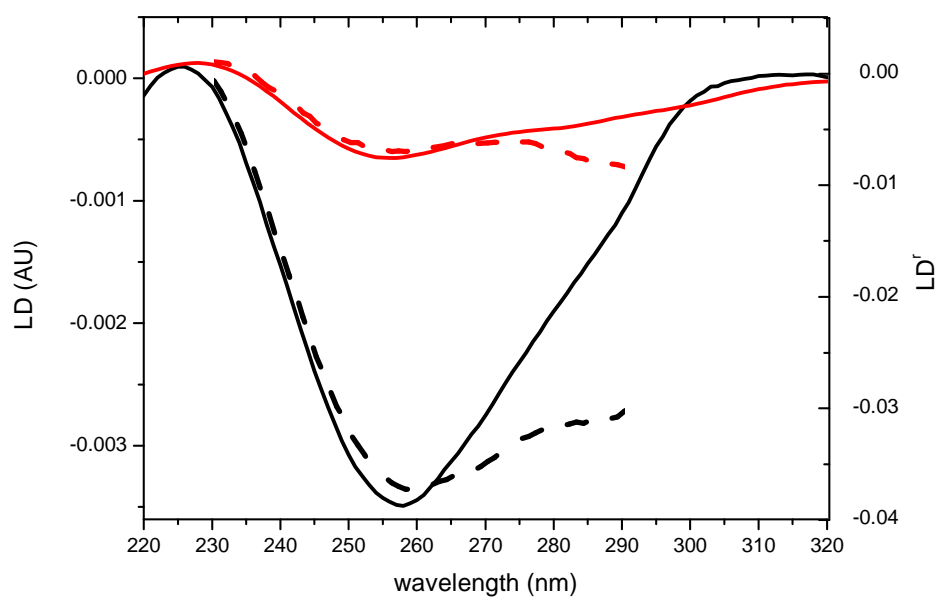

Fig. S1 LD of free HEG-linked oligonucleotides in PVA A) AT-DNA in 75% r.h. (black solid) and  $LD^f$  (black dashed) and in 100% r.h. (red solid) and  $LD^f$  (red dashed), B) GC-DNA in 75% r.h. (black solid) and  $LD^f$  (black dashed) and in 100% r.h. (red solid) and  $LD^f$  (red dashed). All samples were stretched 50%  $R_s=1,5$

## 2. Absorption spectra in PVA of oligonucleotides with ruthenium (II) complexes

Standard decrease in absorbance amplitude occurs due to stretching. Absorption spectrum does not change with humidity conditions after stretching.

A

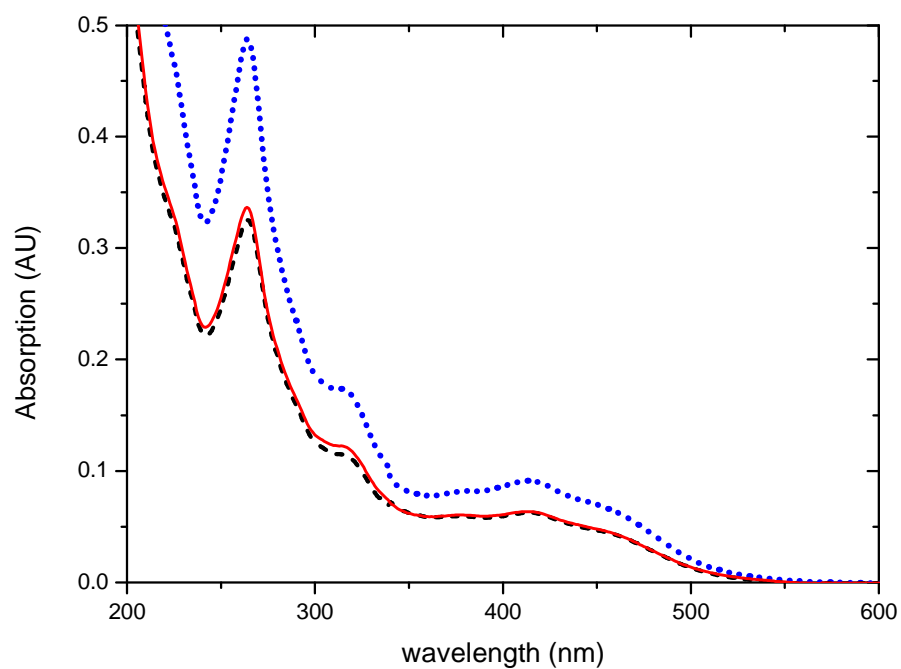

B

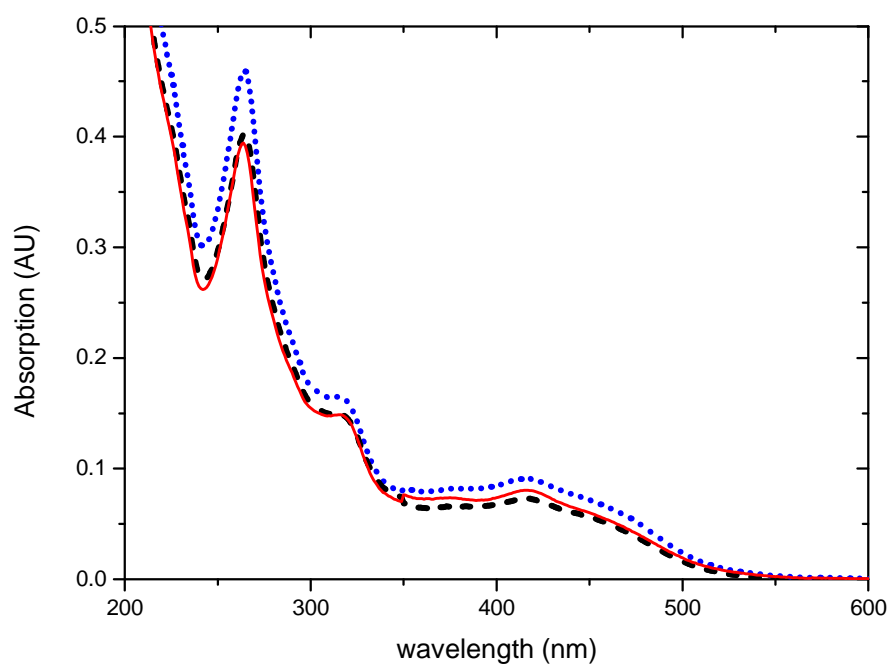

C

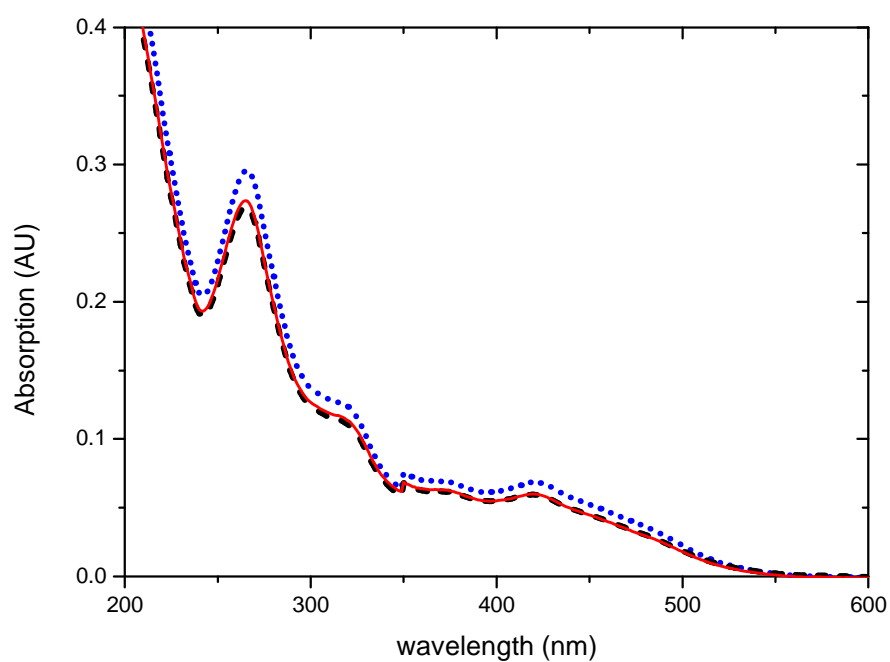

D

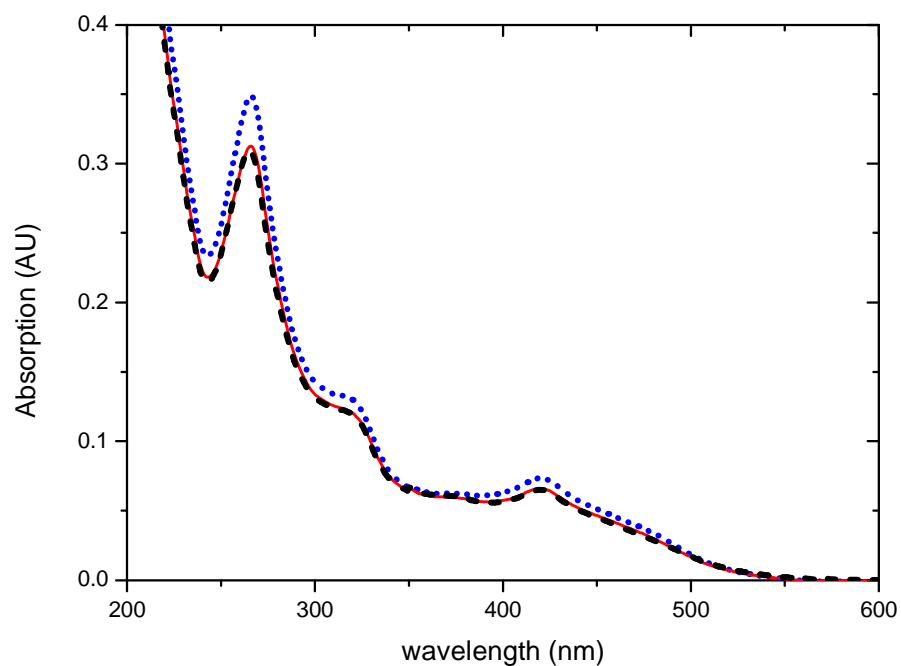

Fig S2. Absorption spectra of DNA-drug complexes in PVA recorded on isotropic samples (before stretching) (blue dotted) and after stretching  $R_s = 1,5$  in either 75% r.h. (black dashed) or 100% r.h. (red solid) conditions A)  $\Delta\Delta$ -GC-DNA, B)  $\Delta\Delta$ -GC-DNA, C)  $\Delta\Delta$ -AT-DNA, D)  $\Delta\Delta$ -AT-DNA

### 3. Linear combination of free $\Lambda\Lambda$ in PVA and $\Lambda\Lambda$ with GC-DNA in 75% r.h.

Linear combination showing that around 1/4 of the complex is dissociated and aligned parallel with PVA chains. A free fraction of the complex is affecting LD spectrum as was shown in Fig 2 B in the manuscript.

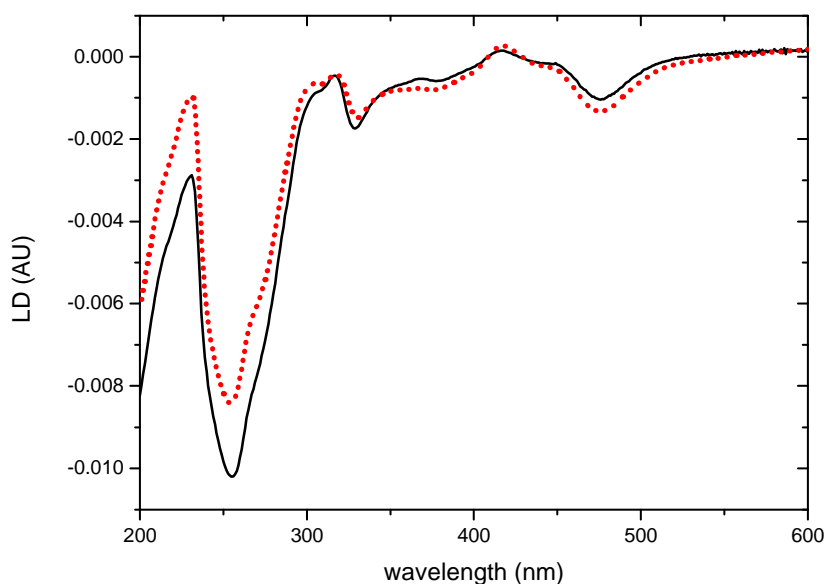

Fig. S3 Linear combination of free  $\Lambda\Lambda$  in PVA and  $\Lambda\Lambda$  with GC-DNA in 75% r.h. (dotted red) and LD of GC-DNA with  $\Lambda\Lambda$  in 100% r.h. for comparison.

### 4. CD of free $\Delta\Delta$ and $\Lambda\Lambda$ and in mixture with GC-DNA

A

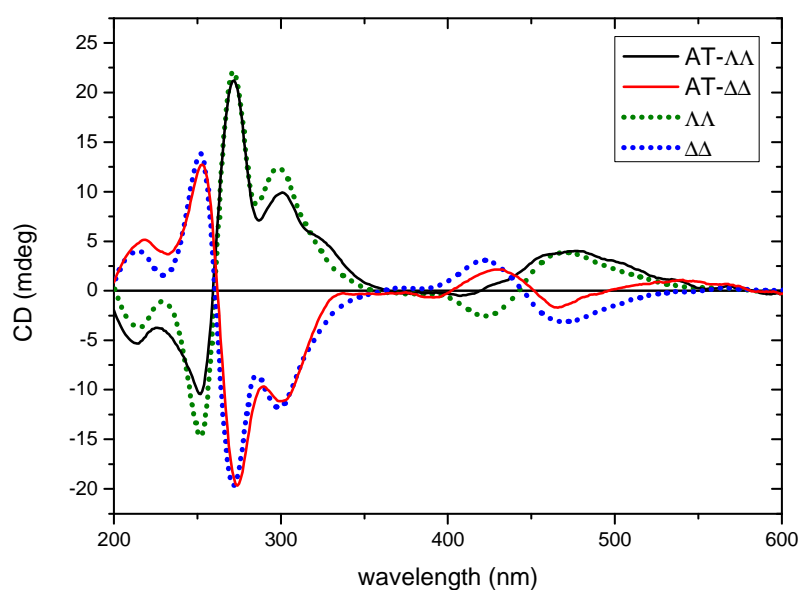

B

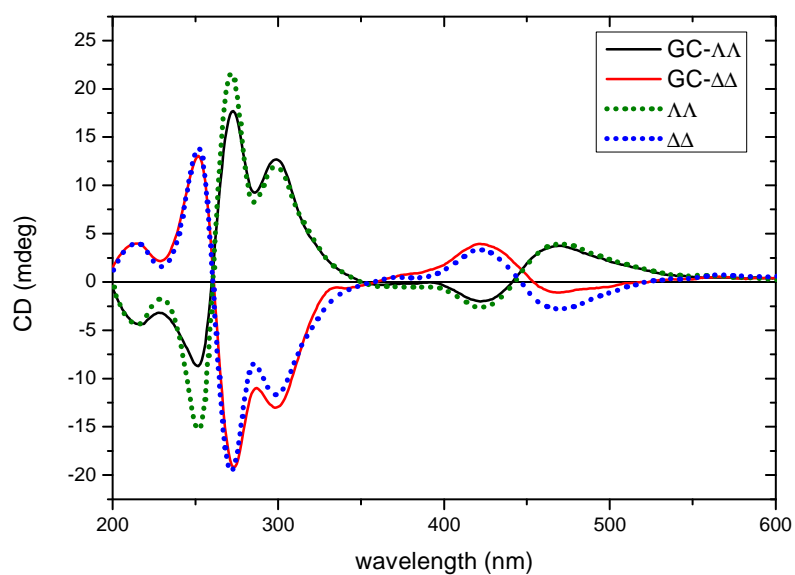

Fig. S4 CD spectra of A)  $\Delta\Delta$  in buffer solution (dotted blue) and in presence of GC oligonucleotide (solid red),  $\Lambda\Delta$  in buffer solution (dotted green) and in presence of GC DNA (solid black);

#### 5. LD spectrum of stretched PVA in 75% and 100% r.h.

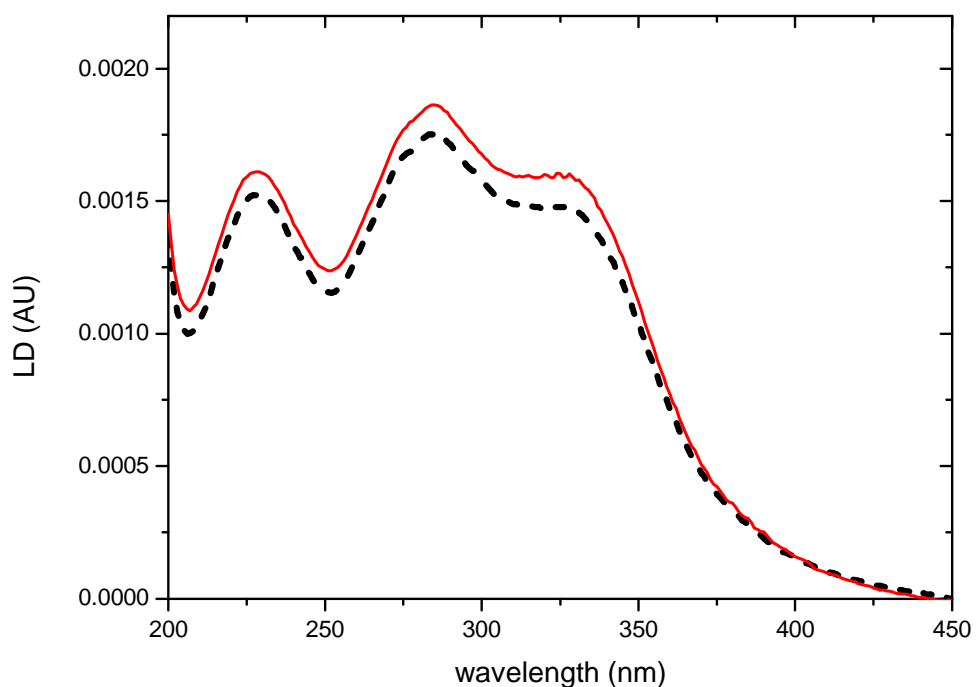

Fig. S5 Change in LD amplitude of PVA comparing 100% r.h. (red solid) and 75% r.h. (black dashed) due to hydration state;
